# Supplementary material for: Low bandgap copolymers based on monofluorinated isoindigo towards efficient polymer solar cells
Source: Royal Society of Chemistry journal article supplement (doi:10.1039/c5py00693g), 2015-01-01
Supplement: c5py00693g1.pdf [file c5py00693g1.pdf]

## Electronic Supplementary Information

### Low bandgap copolymers based on monofluorinated isoindigo towards efficient polymer solar cells

Mirco Tomassetti,<sup>a,b,c</sup> Farid Ouhib,<sup>a</sup> Arnaud Wislez,<sup>d</sup> Anne-Sophie Duwez,<sup>d</sup> Huguette Penxten,<sup>b</sup> Wouter Dierckx,<sup>c</sup> Ilaria Cardinaletti,<sup>c</sup> Ralf A.A. Bovee,<sup>e</sup> Gijs W. P. van Pruissen,<sup>e</sup> Christine Jérôme,<sup>a</sup> Jean Manca,<sup>f</sup> Wouter Maes<sup>\*b,g</sup> and Christophe Detrembleur<sup>\*a</sup>

<sup>a</sup> Center for Education and Research on Macromolecules (CERM), University of Liège (Ulg), Chemistry Department, Sart-Tilman B6A, 4000 Liège, Belgium

<sup>b</sup> Design & Synthesis of Organic Semiconductors (DSOS), Institute for Materials Research (IMO-IMOMECE), Hasselt University, Agoralaan 1 - Building D, 3590 Diepenbeek, Belgium

<sup>c</sup> Material Physics Division, Hasselt University, Universitaire Campus – Wetenschapspark 1, 3590 Diepenbeek, Belgium

<sup>d</sup> Nanochemistry and Molecular Systems, University of Liège (Ulg), Chemistry Department, Sart-Tilman B6a, 4000 Liège, Belgium

<sup>e</sup> Molecular Materials and Nanosystems, Institute for Complex Molecular Systems, Eindhoven University of Technology, P.O. Box 513, 5600 MB Eindhoven, The Netherlands

<sup>f</sup> X-Lab, Hasselt University, Agoralaan 1, B-3590 Diepenbeek, Belgium

<sup>g</sup> IMEC, IMOMECE, Universitaire Campus – Wetenschapspark 1, B-3590 Diepenbeek, Belgium

#### Table of contents

|                                                        |    |
|--------------------------------------------------------|----|
| 1. Solar cell optimization tables                      | S2 |
| 2. <sup>1</sup> H NMR spectra of monomers and polymers | S5 |
| 3. Gel permeation chromatograms and data               | S9 |

## 1. Solar cell optimization tables

**Table S1.** Overview of the solar cell optimization studies for copolymer **PIID-5T**.

| PIID-5T:PC <sub>71</sub> BM<br>(w/w) | Total conc.<br>(mg/mL) | Solvent                       | DIO<br>(% v/v) | Annealing<br>(°C-min) | V <sub>oc</sub><br>(V) | J <sub>sc</sub><br>(mA/cm <sup>2</sup> ) | FF<br>(%) | PCE<br>(%)  |
|--------------------------------------|------------------------|-------------------------------|----------------|-----------------------|------------------------|------------------------------------------|-----------|-------------|
| 1:1                                  | 20                     | odCB                          | -              | -                     | 0.69                   | 8.88                                     | 43        | 2.61        |
| 1:1                                  | 20                     | odCB                          | -              | 140-30                | 0.71                   | 6.28                                     | 50        | 2.24        |
| 1:1                                  | 20                     | CHCl <sub>3</sub> :odCB (1:1) | -              | -                     | 0.67                   | 8.18                                     | 37        | 2.01        |
| 1:1                                  | 20                     | CHCl <sub>3</sub> :odCB (1:1) | -              | 120-10                | 0.70                   | 6.69                                     | 40        | 1.88        |
| 1:2                                  | 25                     | odCB                          | -              | -                     | 0.70                   | 6.95                                     | 47        | 2.30        |
| 1:2                                  | 25                     | odCB                          | -              | 120-10                | 0.71                   | 4.64                                     | 56        | 1.83        |
| <b>1:3</b>                           | <b>25</b>              | <b>odCB</b>                   | -              | -                     | <b>0.70</b>            | <b>6.51</b>                              | <b>58</b> | <b>2.64</b> |
| 1:3                                  | 25                     | odCB                          | -              | 120-2                 | 0.72                   | 5.37                                     | 64        | 2.45        |
| <b>1:3</b>                           | <b>25</b>              | <b>odCB</b>                   | -              | <b>120-5</b>          | <b>0.71</b>            | <b>6.19</b>                              | <b>64</b> | <b>2.83</b> |
| 1:3                                  | 25                     | odCB                          | 3              | -                     | 0.67                   | 8.03                                     | 39        | 2.12        |
| 1:3                                  | 25                     | odCB                          | 3              | 120-5                 | 0.69                   | 5.11                                     | 53        | 1.85        |

**Table S2.** Overview of the solar cell optimization studies for copolymer **PFIID-5T**.

| PFIID-5T:PC <sub>71</sub> BM<br>(w/w) | Total conc.<br>(mg/mL) | Solvent     | DIO<br>(% v/v) | Annealing<br>(°C-min) | V <sub>oc</sub><br>(V) | J <sub>sc</sub><br>(mA/cm <sup>2</sup> ) | FF<br>(%) | PCE<br>(%)  |
|---------------------------------------|------------------------|-------------|----------------|-----------------------|------------------------|------------------------------------------|-----------|-------------|
| 1:1                                   | 25                     | odCB        | -              | -                     | 0.60                   | 7.94                                     | 44        | 2.10        |
| 1:1                                   | 25                     | odCB        | -              | 120-2                 | 0.64                   | 6.74                                     | 44        | 1.94        |
| 1:1                                   | 25                     | odCB        | -              | 120-5                 | 0.64                   | 7.41                                     | 49        | 2.33        |
| 1:2                                   | 25                     | odCB        | -              | -                     | 0.62                   | 7.59                                     | 66        | 3.13        |
| 1:2                                   | 25                     | odCB        | -              | 120-2                 | -                      | -                                        | -         | -           |
| 1:2                                   | 25                     | odCB        | -              | 120-5                 | -                      | -                                        | -         | -           |
| <b>1:3</b>                            | <b>25</b>              | <b>odCB</b> | -              | -                     | <b>0.61</b>            | <b>9.88</b>                              | <b>60</b> | <b>3.64</b> |
| 1:3                                   | 25                     | odCB        | -              | 120-2                 | 0.65                   | 9.08                                     | 63        | 3.68        |
| <b>1:3</b>                            | <b>25</b>              | <b>odCB</b> | -              | <b>120-5</b>          | <b>0.65</b>            | <b>8.93</b>                              | <b>64</b> | <b>3.72</b> |
| 1:3                                   | 25                     | odCB        | 1              | -                     | 0.58                   | 9.39                                     | 55        | 3.00        |
| 1:3                                   | 25                     | odCB        | 1              | 120-5                 | 0.61                   | 8.28                                     | 61        | 3.08        |
| 1:3                                   | 25                     | odCB        | 2              | -                     | 0.58                   | 9.64                                     | 54        | 3.03        |
| 1:3                                   | 25                     | odCB        | 2              | 120-5                 | 0.64                   | 7.96                                     | 59        | 3.03        |
| 1:3                                   | 25                     | odCB        | 3              | -                     | 0.58                   | 9.79                                     | 48        | 2.73        |
| 1:3                                   | 25                     | odCB        | 3              | 120-5                 | 0.64                   | 7.32                                     | 59        | 2.78        |
| 1:4                                   | 25                     | odCB        | -              | -                     | 0.59                   | 9.47                                     | 53        | 2.97        |
| 1:4                                   | 25                     | odCB        | -              | 120-2                 | 0.63                   | 9.88                                     | 58        | 3.64        |
| 1:4                                   | 25                     | odCB        | -              | 120-5                 | 0.63                   | 9.69                                     | 60        | 3.64        |

**Table S3.** Overview of the solar cell optimization studies for copolymer **PFIID-5T\_H**.

| <b>PFIID-5T_H:PC<sub>71</sub>BM</b><br>(w/w) | Total conc.<br>(mg/mL) | Solvent     | DIO<br>(% v/v) | Annealing<br>(°C-min) | V <sub>oc</sub><br>(V) | J <sub>sc</sub><br>(mA/cm <sup>2</sup> ) | FF<br>(%) | PCE<br>(%)  |
|----------------------------------------------|------------------------|-------------|----------------|-----------------------|------------------------|------------------------------------------|-----------|-------------|
| 1:1                                          | 12                     | odCB        | -              | -                     | 0.61                   | 8.52                                     | 57        | 2.96        |
| 1:1                                          | 12                     | odCB        | -              | 120-5                 | 0.64                   | 7.06                                     | 57        | 2.55        |
| 1:2                                          | 15                     | odCB        | -              | -                     | 0.59                   | 9.60                                     | 60        | 3.44        |
| 1:2                                          | 15                     | odCB        | -              | 120-5                 | 0.63                   | 9.27                                     | 56        | 3.30        |
| 1:2                                          | 12                     | odCB        | -              | -                     | 0.58                   | 4.84                                     | 61        | 1.72        |
| 1:2                                          | 12                     | odCB        | -              | 120-5                 | 0.61                   | 5.04                                     | 58        | 1.78        |
| <b>1:3</b>                                   | <b>16</b>              | <b>odCB</b> | -              | -                     | <b>0.59</b>            | <b>13.88</b>                             | <b>61</b> | <b>5.04</b> |
| 1:3                                          | 16                     | odCB        | -              | -                     | 0.62                   | 10.99                                    | 60        | 4.13        |
| 1:4                                          | 12                     | odCB        | -              | -                     | 0.59                   | 5.94                                     | 65        | 2.25        |
| 1:4                                          | 12                     | odCB        | -              | 120-5                 | 0.62                   | 6.34                                     | 64        | 2.52        |

**Table S4.** Overview of the solar cell optimization study for the mixed **PFIID-5T:PFIID-5T\_H** blend.

| <b>PFIID-5T:PFIID-5T_H:PC<sub>71</sub>BM</b><br>(w/w) | Total conc.<br>(mg/mL) | Solvent | V <sub>oc</sub><br>(V) | J <sub>sc</sub><br>(mA/cm <sup>2</sup> ) | FF<br>(%) | PCE<br>(%) |
|-------------------------------------------------------|------------------------|---------|------------------------|------------------------------------------|-----------|------------|
| 0.5:0.5:3                                             | 16                     | odCB    | 0.59                   | 10.81                                    | 62        | 4.00       |

**Table S5.** Overview of the solar cell optimization studies for copolymer **PFIID-T-BDT-T**.

| <b>PFIID-T-BDT-T:PC<sub>71</sub>BM</b><br>(w/w) | Total conc.<br>(mg/ml) | Solvent           | DIO<br>(% v/v) | Annealing<br>(°C-min) | V <sub>oc</sub><br>(V) | J <sub>sc</sub><br>(mA/cm <sup>2</sup> ) | FF<br>(%) | PCE<br>(%)  |
|-------------------------------------------------|------------------------|-------------------|----------------|-----------------------|------------------------|------------------------------------------|-----------|-------------|
| <b>1:1</b>                                      | 25                     | odCB              | -              | -                     | 0.86                   | 1.43                                     | 45        | 0.55        |
| 1:1                                             | 25                     | odCB              | -              | 120-5                 | 0.88                   | 1.45                                     | 50        | 0.64        |
| <b>1:2</b>                                      | 25                     | odCB              | -              | -                     | 0.86                   | 2.32                                     | 54        | 1.08        |
| 1:2                                             | 25                     | odCB              | -              | 120-5                 | 0.88                   | 1.92                                     | 59        | 0.99        |
| <b>1:3</b>                                      | <b>25</b>              | <b>odCB</b>       | -              | -                     | <b>0.86</b>            | <b>2.66</b>                              | <b>57</b> | <b>1.30</b> |
| 1:3                                             | 25                     | odCB              | -              | 120-2                 | 0.88                   | 2.42                                     | 60        | 1.28        |
| <b>1:3</b>                                      | <b>25</b>              | <b>odCB</b>       | -              | <b>120-5</b>          | <b>0.87</b>            | <b>2.32</b>                              | <b>60</b> | <b>1.22</b> |
| 1:3                                             | 25                     | odCB              | 3              | -                     | 0.78                   | 1.56                                     | 46        | 0.56        |
| 1:3                                             | 25                     | odCB              | 3              | -                     | 0.71                   | 0.38                                     | 44        | 0.12        |
| 1:3                                             | 12                     | CHCl <sub>3</sub> | -              | -                     | 0.84                   | 1.00                                     | 60        | 0.51        |
| 1:3                                             | 12                     | CHCl <sub>3</sub> | -              | 120-5                 | 0.86                   | 1.06                                     | 59        | 0.54        |
| 1:3                                             | 20                     | CB                | -              | -                     | 0.84                   | 1.49                                     | 63        | 0.79        |
| 1:3                                             | 20                     | CB                | -              | 120-5                 | 0.85                   | 1.26                                     | 61        | 0.66        |
| <b>1:4</b>                                      | 25                     | odCB              | -              | -                     | 0.85                   | 2.62                                     | 57        | 1.27        |
| 1:4                                             | 25                     | odCB              | -              | 120-5                 | 0.86                   | 2.57                                     | 58        | 1.28        |

**Table S6.** Overview of the solar cell optimization studies for copolymer **PFIID-2T-BDT-2T**.

| <b>PFIID-2T-BDT-2T:PC<sub>71</sub>BM</b><br>(w/w) | Total conc.<br>(mg/mL) | Solvent           | DIO<br>(% v/v) | Annealing<br>(°C-min) | V <sub>oc</sub><br>(V) | J <sub>sc</sub><br>(mA/cm <sup>2</sup> ) | FF<br>(%) | PCE<br>(%)  |
|---------------------------------------------------|------------------------|-------------------|----------------|-----------------------|------------------------|------------------------------------------|-----------|-------------|
| <b>1:3</b>                                        | <b>25</b>              | <b>odCB</b>       | -              | -                     | <b>0.68</b>            | <b>6.33</b>                              | <b>57</b> | <b>2.45</b> |
| 1:3                                               | 25                     | odCB              | -              | 120-2                 | 0.75                   | 5.53                                     | 63        | 2.62        |
| <b>1:3</b>                                        | <b>25</b>              | <b>odCB</b>       | -              | <b>120-5</b>          | <b>0.74</b>            | <b>4.68</b>                              | <b>64</b> | <b>2.23</b> |
| 1:3                                               | 25                     | odCB              | 3              | -                     | 0.61                   | 4.76                                     | 29        | 0.85        |
| 1:3                                               | 25                     | odCB              | 3              | 120-2                 | 0.72                   | 5.00                                     | 46        | 1.66        |
| 1:3                                               | 12                     | CHCl <sub>3</sub> | -              | -                     | 0.74                   | 1.42                                     | 68        | 0.72        |
| 1:3                                               | 12                     | CHCl <sub>3</sub> | -              | 120-5                 | 0.76                   | 1.62                                     | 66        | 0.81        |
| 1:3                                               | 20                     | CB                | -              | -                     | 0.64                   | 2.47                                     | 43        | 0.68        |
| 1:3                                               | 20                     | CB                | -              | 120-5                 | 0.22                   | 2.64                                     | 34        | 0.20        |
| 1:3                                               | 20                     | odCB              | -              | 100-5                 | 0.73                   | 5.71                                     | 46        | 1.91        |
| 1:3                                               | 20                     | odCB              | -              | 120-5                 | 0.76                   | 5.98                                     | 49        | 2.22        |

## 2. $^1\text{H}$ NMR spectra of monomers and polymers

Figure S1.  $^1\text{H}$  NMR spectrum of monomer 6 ( $\text{CDCl}_3$ ).

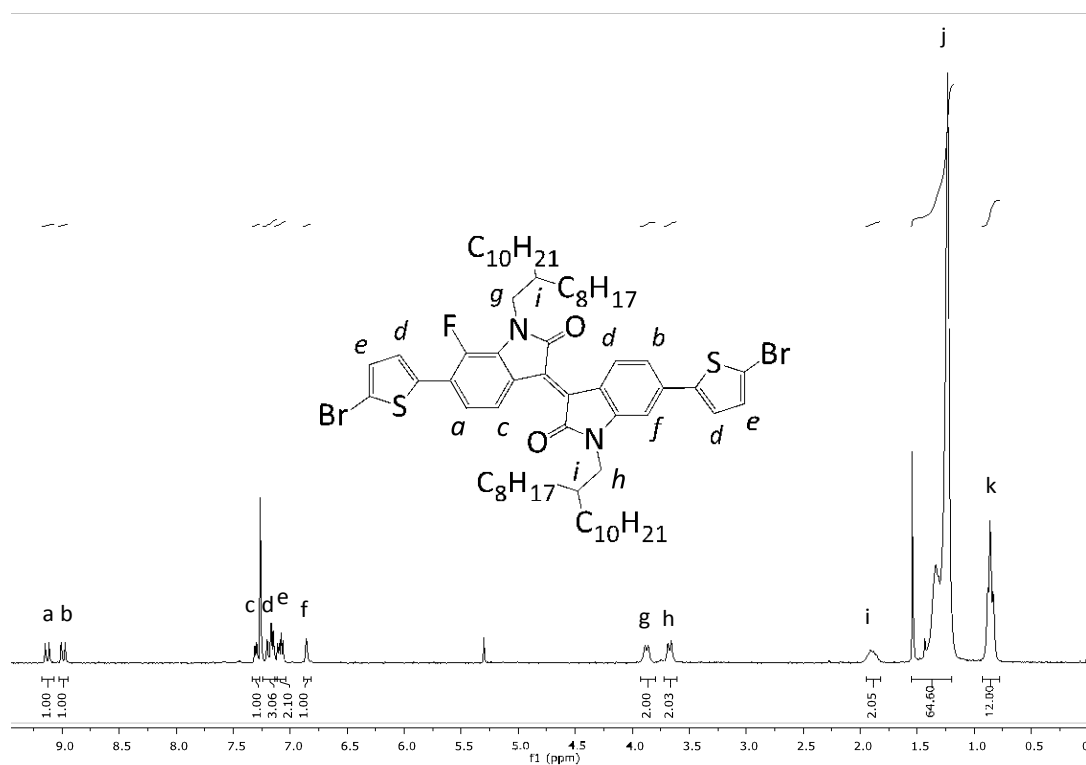

Figure S2.  $^1\text{H}$  NMR spectrum of monomer 9 ( $\text{CDCl}_3$ ).

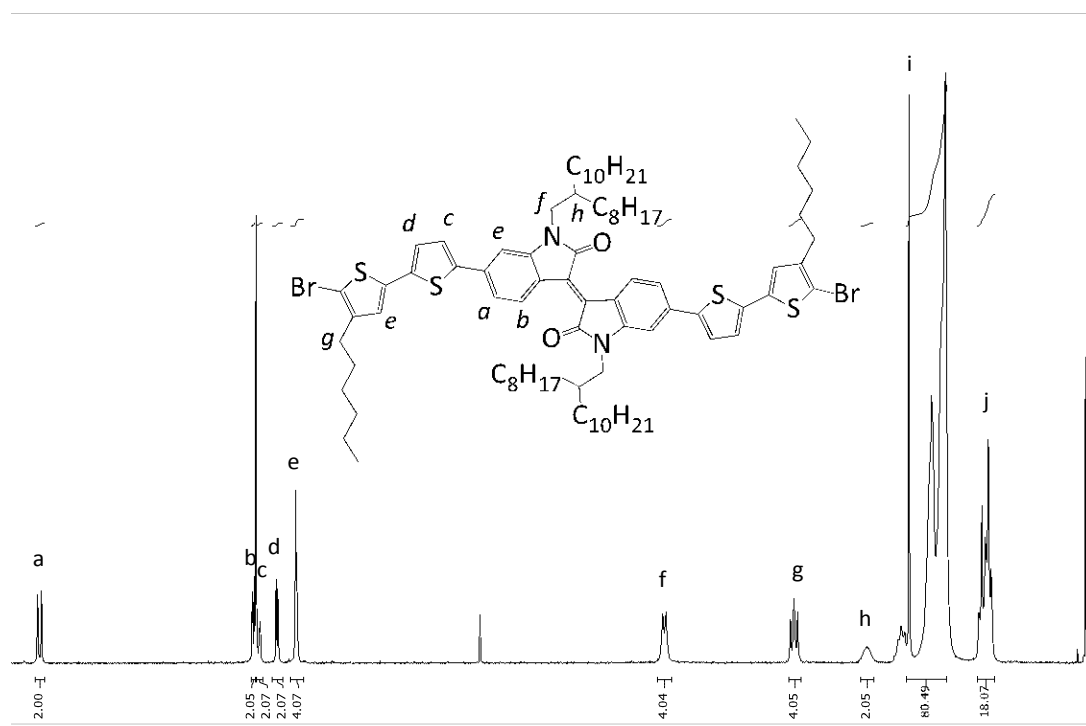

9.0 8.5 8.0 7.5 7.0 6.5 6.0 5.5 5.0 4.5  
f1 (ppm)

Figure S3.  $^1\text{H}$  NMR spectrum of monomer **10** ( $\text{CDCl}_3$ ).

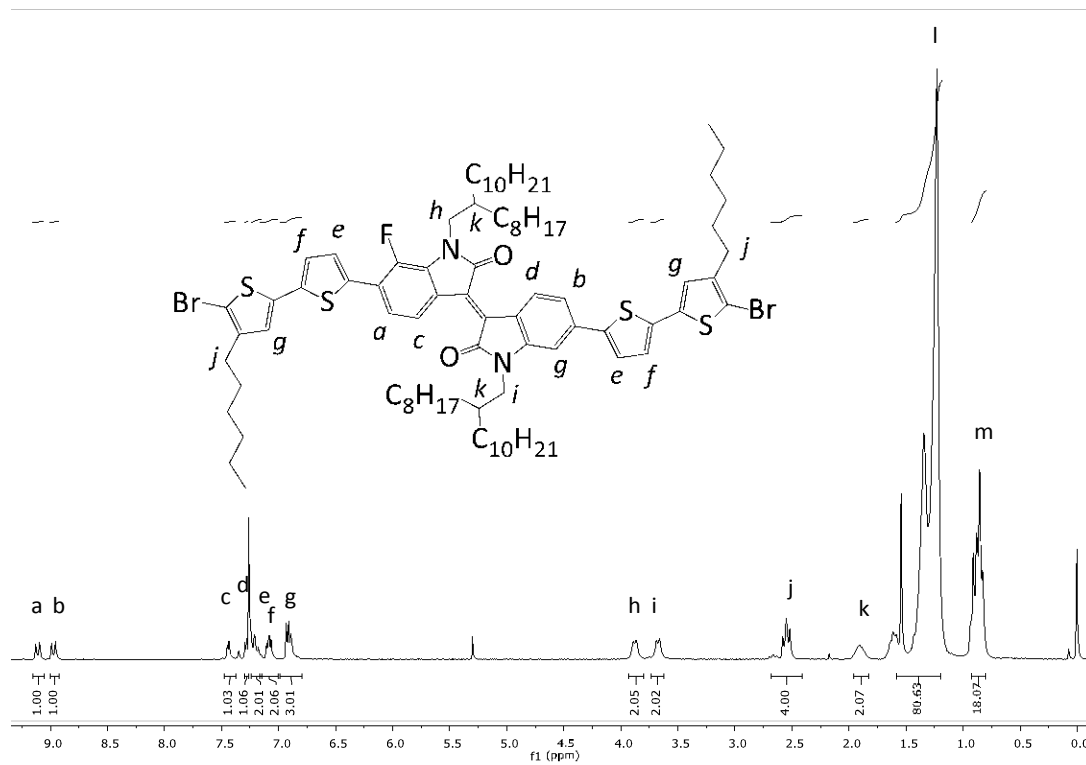

Figure S4.  $^1\text{H}$  NMR spectrum of **PIID-5T** ( $\text{C}_2\text{D}_2\text{Cl}_4$ ,  $100\text{ }^\circ\text{C}$ ).





Figure S5.  $^1\text{H}$  NMR spectrum of PFIID-5T ( $\text{C}_2\text{D}_2\text{Cl}_4$ ,  $100\text{ }^\circ\text{C}$ ).

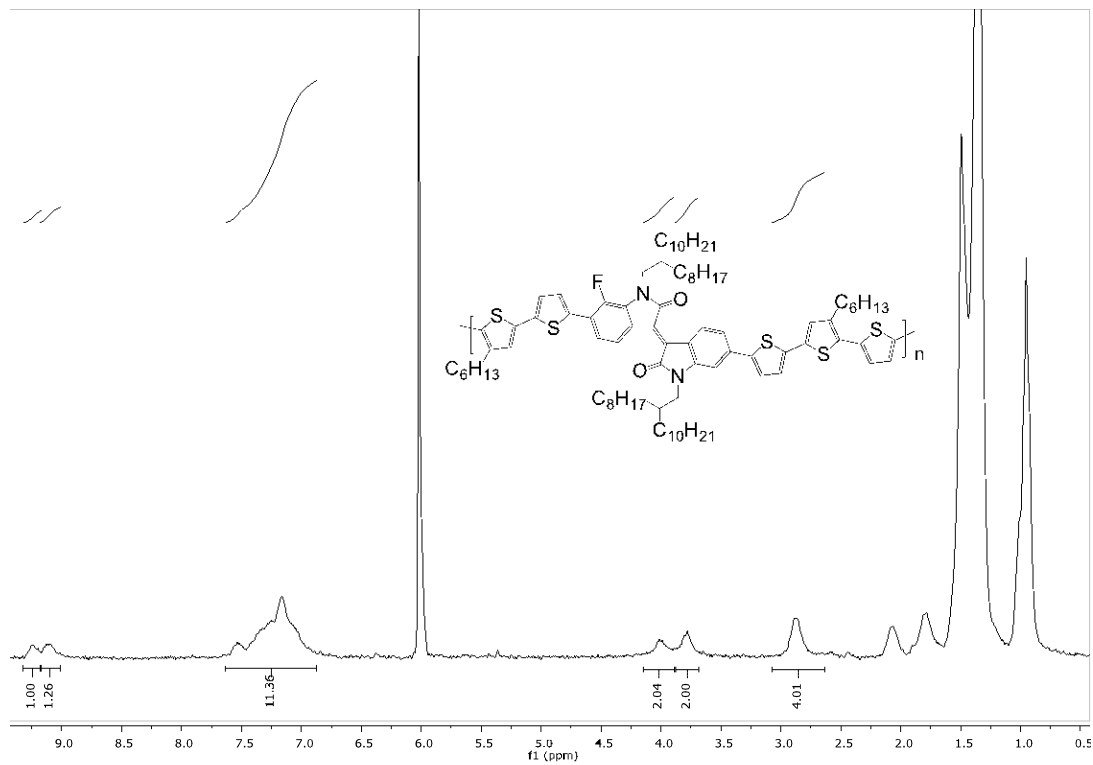

Figure S6.  $^1\text{H}$  NMR spectrum of PFIID-T-BDT-T ( $\text{C}_2\text{D}_2\text{Cl}_4$ ,  $100\text{ }^\circ\text{C}$ ).

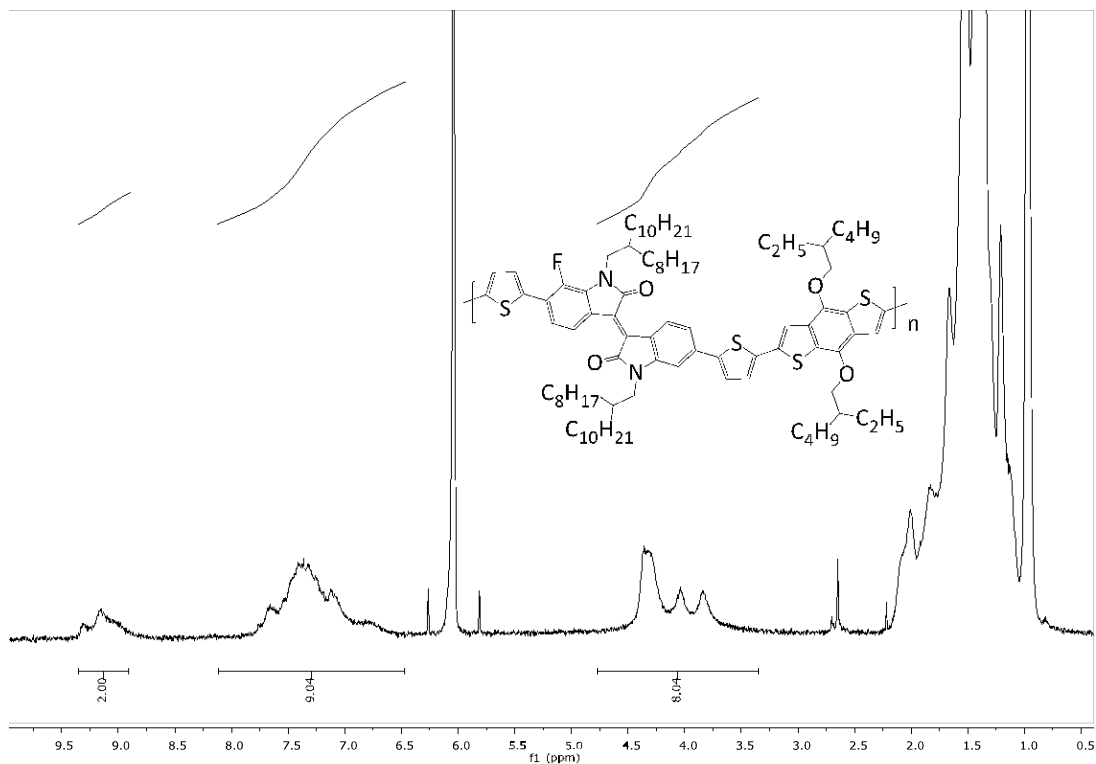

Figure S7.  $^1\text{H}$  NMR spectrum of PFIID-2T-BDT-2T ( $\text{C}_2\text{D}_2\text{Cl}_4$ ,  $100\text{ }^\circ\text{C}$ ).

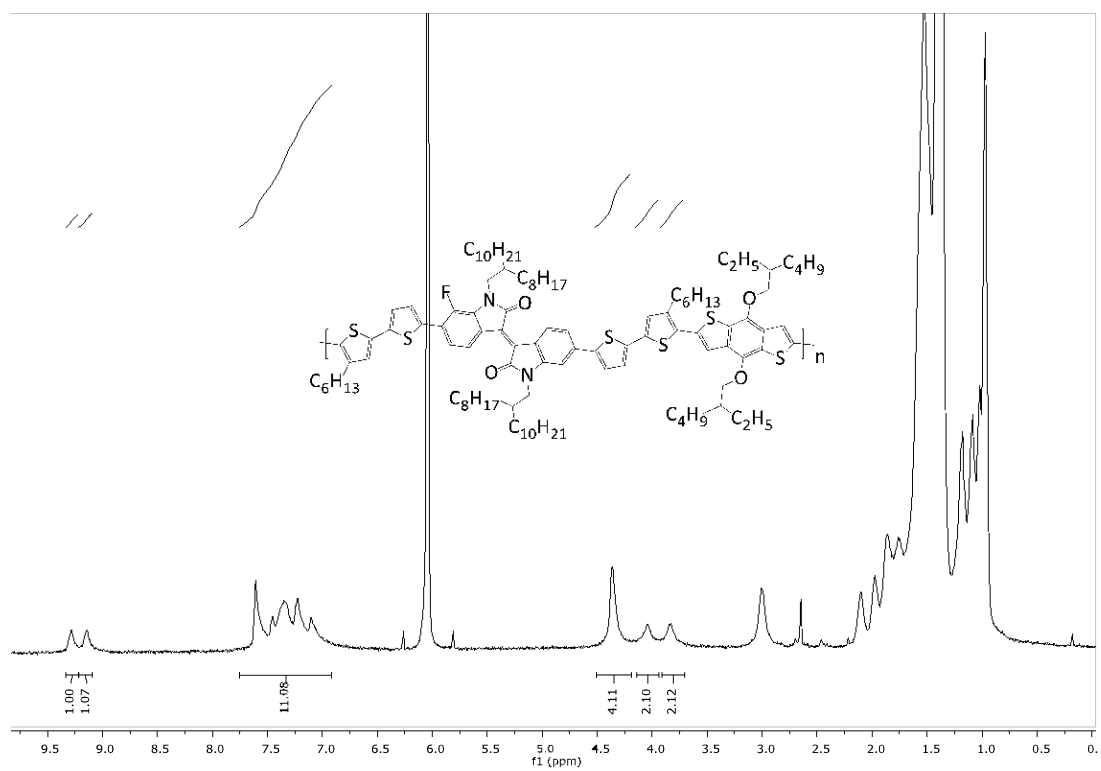

### 3. Gel permeation chromatograms and data

**Figure S8.** Gel permeation chromatograms for the copolymers (using *ortho*-dichlorobenzene at 140 °C as an eluent).

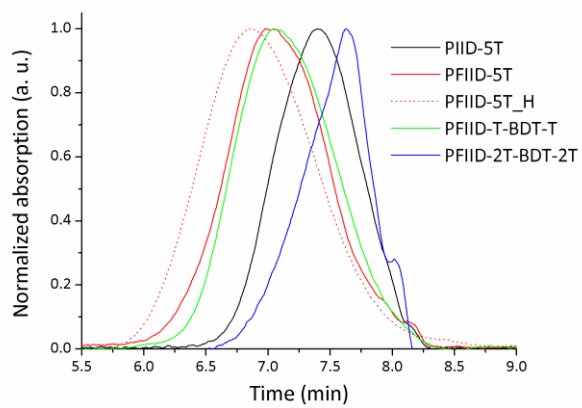

| Copolymer       | $M_n$<br>(kg/mol) | $D$ |
|-----------------|-------------------|-----|
| PIID-5T         | 20.8              | 2.0 |
| PFIID-5T        | 36.1              | 3.2 |
| PFIID-5T_H      | 45.3              | 4.4 |
| PFIID-T-BDT-T   | 32.8              | 2.8 |
| PFIID-2T-BDT-2T | 15.8              | 1.9 |
